# Supplementary material
Source: PubMed Central journal article supplement (PMC6753652)
Supplement: jama-322-1167-s001.pdf [file jama-322-1167-s001.pdf]

## Supplementary Online Content

Roumie CL, Chipman J, Min JY, et al. Association of treatment with metformin vs sulfonylurea with major adverse cardiovascular events among patients with diabetes and reduced kidney function. *JAMA*. doi:10.1001/jama.2019.13206

**eTable 1.** Definitions of Comorbid Conditions and Medications, on the Basis Of Codes in 720 Days Before Reaching the Reduced Kidney Function Threshold and Prescriptions in the 180 Days Before Kidney Threshold

**eTable 2.** Description of Propensity Score Model and Treatment Weights

**eTable 3.** Risk of Major Adverse Cardiovascular Events in Subgroups Stratified by History of Cardiovascular Disease, Age, Race, Estimated Glomerular Filtration Rate at Time of Reaching Kidney Threshold, and Cohort Entry Criteria Reduced Estimated Glomerular Filtration Rate or Elevated Creatinine

**eFigure 1.** Study Design Schematic

**eFigure 2.** Distribution of Propensity Scores by Drug

**eFigure 3.** Mean Standardized Differences Comparing Metformin versus Sulfonylurea Before and After Weighting the Cohort

**eFigure 4.** Deviance for the Propensity Score Model

**eFigure 5.** Complete Aalen-Johansen Cumulative Probability of Major Adverse Cardiovascular Events With the Competing Risks of Nonpersistence and Death From Noncardiovascular Cause in Cohort Using Matching Weights

This supplementary material has been provided by the authors to give readers additional information about their work.

**eTable 1: Definitions of comorbid conditions based on codes in 720 days before reaching kidney threshold; Definitions of medications used are restricted to prescription fill in the 180 days before reaching kidney threshold**

| <b>Covariate Condition</b>      | <b>Inclusive conditions</b>                                | <b>Definition*</b>                                                                                                                                                                                                                                                                                                                                                                                                                                                                                                                                                                                                                                                                                                                                                                                                                                                                                                                                                                                                                                              |
|---------------------------------|------------------------------------------------------------|-----------------------------------------------------------------------------------------------------------------------------------------------------------------------------------------------------------------------------------------------------------------------------------------------------------------------------------------------------------------------------------------------------------------------------------------------------------------------------------------------------------------------------------------------------------------------------------------------------------------------------------------------------------------------------------------------------------------------------------------------------------------------------------------------------------------------------------------------------------------------------------------------------------------------------------------------------------------------------------------------------------------------------------------------------------------|
| <b>Malignancy</b>               | Cancer excluding non melanoma skin cancer                  | ICD 9- CM diagnosis codes:140.X-208.X (exclude 173)<br>ICD10 diagnosis codes: C00* - C96*; D37* -D48*                                                                                                                                                                                                                                                                                                                                                                                                                                                                                                                                                                                                                                                                                                                                                                                                                                                                                                                                                           |
| <b>Liver failure</b>            | End stage liver disease                                    | ICD 9- CM diagnosis codes: 570.X- 573.X<br>ICD10 diagnosis codes: K72*; K70.*; K73.*; K74.*; K76.*                                                                                                                                                                                                                                                                                                                                                                                                                                                                                                                                                                                                                                                                                                                                                                                                                                                                                                                                                              |
| <b>Respiratory Failure</b>      | Respiratory failure/<br>Pulmonary<br>Embolism/Hypertension | ICD 9- CM diagnosis codes: 518.81, 518.83, 518.84, 799.1, 415.X, 416.X<br>ICD10 diagnosis codes: J96.*; R092; I26.9*; I27.*                                                                                                                                                                                                                                                                                                                                                                                                                                                                                                                                                                                                                                                                                                                                                                                                                                                                                                                                     |
| <b>Congestive Heart Failure</b> | CHF (excluding post procedure-CHF)                         | ICD 9- CM diagnosis codes: 428.X, 402.01, 402.11, 402.91, 404.01, 404.03, 404.11, 404.13, 404.91, 404.93<br>ICD10 diagnosis codes: I11.0, I13.0, I13.2, I50.9, I50.1, I50.20, I50.21, I50.22, I50.23, I50.30, I50.31, I50.32, I50.33, I50.40, I50.41, I50.42, I50.43                                                                                                                                                                                                                                                                                                                                                                                                                                                                                                                                                                                                                                                                                                                                                                                            |
| <b>Cardiovascular disease</b>   | 1. MI                                                      | ICD 9- CM diagnosis codes: 410.X, 412.X, 429.7X<br>ICD10 diagnosis codes: I21*                                                                                                                                                                                                                                                                                                                                                                                                                                                                                                                                                                                                                                                                                                                                                                                                                                                                                                                                                                                  |
|                                 | 2. Obstructive coronary disease                            | ICD 9- CM diagnosis codes: 411.X, 413.X, 414.X<br>ICD10 diagnosis codes: I24.*; I25.*; I20.*<br>ICD9-CM procedure codes: 36.01, 36.02, 36.03, 36.05, 36.09, 36.10-36.19<br>CPT procedure codes: 33533-36, 33510-23, 33530, 92980-82,92984, 92995-6, 92974                                                                                                                                                                                                                                                                                                                                                                                                                                                                                                                                                                                                                                                                                                                                                                                                       |
|                                 | 3. Peripheral artery disease or revascularization          | ICD 9- CM diagnosis codes: 440.2X, 442.2, 443.1, 443.9, 445.0X<br>ICD10 diagnosis codes: I70.2*; I72.*; I77.*; I73.9; I75.*<br>ICD9-CM procedure codes:38.08-09, 38.18, 38.38, 38.39, 38.48, 38.49, 38.88, 38.89, 39.25, 39.29, 39.5, 84.1X<br>CPT procedure codes: 35226,35256, 35286, 35351, 35355, 35371, 35372, 35381, 35454, 35456, 35459, 35473, 35474, 35482, 35483, 35485, 35492, 35493, 35495, 35546, 35548, 35549, 35551, 35556, 35558, 35563, 35565, 35566, 35571, 35583, 35585, 35587, 35646, 35651, 35654, 35656, 35661, 35663, 35665, 35666, 35671, 34800, 34802-5                                                                                                                                                                                                                                                                                                                                                                                                                                                                                |
|                                 | 4. Carotid revascularization                               | ICD9-CM procedure codes: 38.12, 38.11, 00.61, 00.63, 39.28<br>CPT procedure codes: 35301, 0005T, 0006T, 0007T, 0075T, 0076T, 37215, 37216 ICD10 procedure code: 031H0AG, 031H0JG, 031H0KG, 031H0ZG, 031J09G, 031J0AG, 031J0JG, 031J0KG,031H09G, 031J0ZG, 037H34Z, 037H3DZ, 037H3ZZ, 037H44Z, 037H4DZ, 037H4ZZ, 037J3DZ, 037J3ZZ, 037J44Z, 037J4DZ, 037J4ZZ, 037K34Z, 037K3DZ, 037K3ZZ, 037K4DZ, 037K4ZZ, 037L34Z, 037L3DZ, 037L3ZZ, 037L44Z, 037L4DZ, 037L4ZZ, 037M34Z, 037M3DZ, 037M3ZZ, 037M44Z, 037M4DZ, 037M4ZZ, 037N34Z, 037N3DZ, 037N3ZZ, 037N44Z, 037N4DZ, 037N4ZZ, 037P34Z, 037P3DZ, 037P3ZZ, 037P44Z, 037P4DZ, 037P4ZZ, 037Q34Z, 037Q3DZ, 037Q3ZZ, 037Q44Z, 037Q4DZ, 037Q4ZZ, 03CH0ZZ, 03CH3ZZ, 03CH4ZZ, 03CJ0ZZ, 03CJ3ZZ, 03CJ4ZZ, 03CK0ZZ, 03CK3ZZ, 03CK4ZZ, 03CL0ZZ, 03CL3ZZ, 03CL4ZZ, 03CM0ZZ, 03CM3ZZ, 03CM4ZZ, 037J34Z, 03CN0ZZ, 03CN3ZZ, 03CN4ZZ, 03CP0ZZ, 03CP3ZZ, 037K44Z, 03CP4ZZ, 03CQ0ZZ, 03CQ3ZZ, 03CQ4ZZ<br>HCPCS procedure code: S2211<br>ICD 9- CM diagnosis codes: 435.X<br>ICD10 diagnosis codes: G45.0; G45.1;G45.8; G45.9; I67.848 |
| <b>TIA</b>                      |                                                            |                                                                                                                                                                                                                                                                                                                                                                                                                                                                                                                                                                                                                                                                                                                                                                                                                                                                                                                                                                                                                                                                 |

| <b>Covariate Condition</b>              | <b>Inclusive conditions</b>       | <b>Definition*</b>                                                                                                                                                                                                                                                                                                                                                                             |
|-----------------------------------------|-----------------------------------|------------------------------------------------------------------------------------------------------------------------------------------------------------------------------------------------------------------------------------------------------------------------------------------------------------------------------------------------------------------------------------------------|
| <b>Stroke</b>                           |                                   | ICD 9- CM diagnosis codes: 430.X, 431.X, 434.X, 436.X<br>ICD10 diagnosis codes: I67.89, I60.9, I61.9, I63.30, I63.40, I63.50, I66.09, I66.19, I66.29, I66.9, I67.89                                                                                                                                                                                                                            |
| <b>Serious Mental illness</b>           | 1. Dementia                       | ICD 9- CM diagnosis codes: 290.X, 291.2, 292.82, 294.1X, 331.0-331.1X, 331.82<br>ICD 10 diagnosis codes: F03.9; F01.5*; F10.27; F19.97; F02.80; F02.81; G30.9; G31.*<br>Medications: Donepezil, Rivastigmine, Galantamine, Tacrine, Memantine, Bethanechol, Ambenonium, Atomoxetine, Ergoloid Mesylates, Dihydrogenated Ergot, Neostigmine, Physostigmine, Pyridostigmine, Riluzole, Hydergine |
|                                         | 2. Depression,                    | ICD 9- CM diagnosis codes: 311, 300.4, 296.2, 296.3, V79.0<br>ICD 10 diagnosis codes: F33.9, F34.1, F32.*                                                                                                                                                                                                                                                                                      |
|                                         | 3. Schizophrenia,                 | ICD 9- CM diagnosis codes: 295.X<br>ICD 10 diagnosis codes: F20.*                                                                                                                                                                                                                                                                                                                              |
|                                         | 4. Bipolar disorder               | ICD 9- CM diagnosis codes: 296.0, 296.4X, 296.5X, 296.6X, 296.7, 296.80, 296.89<br>ICD 10 diagnosis codes: F30.* F31.*                                                                                                                                                                                                                                                                         |
|                                         | 5. Post traumatic stress disorder | ICD 9- CM diagnosis codes: 309.81<br>ICD 10 diagnosis codes: F43.10; F43.12                                                                                                                                                                                                                                                                                                                    |
| <b>Cardiac valve disease</b>            |                                   | ICD 9- CM diagnosis codes: 394.X, 395.X, 396.X, 424.0, 424.1<br>ICD 10 diagnosis codes: I05.*; I06.*; I08.*; I34.*; I35.*;                                                                                                                                                                                                                                                                     |
| <b>Arrhythmia</b>                       | Atrial fibrillation/flutter       | ICD 9- CM diagnosis codes: 427.3X<br>ICD 10 diagnosis codes: I48.91, I48.92                                                                                                                                                                                                                                                                                                                    |
| <b>Smoking</b>                          |                                   | ICD 9- CM diagnosis codes: 305.1, V15.82, 989.84<br>ICD 10 diagnosis codes: F17.200, Z87.891, T65.211A, T65.212A, T65.213A, T65.214A, T65.221A, T65.222A, T65.223A, T65.224A, T65.292A, T65.293A, T65.294A<br>Medications: Varenicline tartrate, Nicotine Replacement (gum, patch, lozenge)                                                                                                    |
| <b>COPD/ Asthma</b>                     |                                   | ICD 9- CM diagnosis codes: 491.X, 492.X, 493.X, 496.X, V17.5, V81.3<br>ICD 10 diagnosis codes: J41.0, J41.1, J44.9, J44.1, J44.0, J41.8, J42-J43.9, J45.20, J45.22, J45.21, J45.990, J45.991, J45.909, J45.998, J45.902, J45.901, Z13.83                                                                                                                                                       |
| <b>HIV</b>                              |                                   | ICD 9- CM diagnosis codes: 042, 079.53, 795.71, V08<br>ICD 10 diagnosis codes: B20.*; B97.35; Z21                                                                                                                                                                                                                                                                                              |
| <b>Parkinson's Disease</b>              |                                   | ICD 9- CM diagnosis codes: 332<br>ICD 10 diagnosis codes: G20; G21.*<br>Medications: Apokyn, Apomorphine, Carbidopa/levodopa, Entacapone, Pergolide, Pramipexole, Ropinirole, Rotigotine, Selegiline, Tolcapone, Zelapar, Azilect/Rasagiline, Emsam, Isocarboxazid, Phenelzine, Tranylcypramine, Biperiden/Akineton, Comtan/Entacapone, Safinamide, Trihexyphenidyl                            |
| <b>Urinary Tract / Kidney Infection</b> |                                   | ICD 9- CM diagnosis codes: 590.*, 599.0*, 595.0<br>ICD 10 diagnosis codes: N11.*; N39.* N30.*                                                                                                                                                                                                                                                                                                  |
| <b>Osteomyelitis</b>                    |                                   | ICD 9- CM diagnosis codes: 730.*<br>ICD 10 diagnosis codes: M86.1*; M86.2*; M86.6*; M86.9*; A02.24                                                                                                                                                                                                                                                                                             |
| <b>Sepsis/Bacteremia</b>                |                                   | ICD 9- CM diagnosis codes: 995.91, 995.92, 038.*, 036.2, 790.7<br>ICD 10 diagnosis codes: A41.9; R65.20; A41.*; A39.4; R78.81                                                                                                                                                                                                                                                                  |
| <b>Pneumonia</b>                        |                                   | ICD 9- CM diagnosis codes: 480.*-486.*, 487.0<br>ICD 10 diagnosis codes: J11.*; J12.*; J13.*; J14.*; J15.*; J16.*; J17.*; J18.*                                                                                                                                                                                                                                                                |

| <b>Covariate Condition</b>                                                       | <b>Inclusive conditions</b>                    | <b>Definition*</b>                                                                                                                                                                                                                                                                                                                                                                                                                                                                                                                                                                                                                                                                                                                                                                                                                                                                              |
|----------------------------------------------------------------------------------|------------------------------------------------|-------------------------------------------------------------------------------------------------------------------------------------------------------------------------------------------------------------------------------------------------------------------------------------------------------------------------------------------------------------------------------------------------------------------------------------------------------------------------------------------------------------------------------------------------------------------------------------------------------------------------------------------------------------------------------------------------------------------------------------------------------------------------------------------------------------------------------------------------------------------------------------------------|
| <b>Fractures (any)</b>                                                           |                                                | ICD 9- CM diagnosis codes: 733.1*, 800.*-829.*, E887<br>ICD 10 diagnosis codes: M84.*; M80.*; S02.*; S12.*; S22.*; S32.*; S42.*; S52.*; S62.*; S72.*; S82.*; S92.*                                                                                                                                                                                                                                                                                                                                                                                                                                                                                                                                                                                                                                                                                                                              |
| <b>Falls</b>                                                                     |                                                | ICD 9- CM diagnosis codes: E880.*, E881.*, E884.*, E885.9<br>ICD 10 diagnosis codes: Z98.8,<br>W18.30XA,W18.49XA,W01.110A,W01.198A,W19.XXXA                                                                                                                                                                                                                                                                                                                                                                                                                                                                                                                                                                                                                                                                                                                                                     |
| <b>Osteoporosis</b>                                                              |                                                | ICD 9- CM diagnosis codes: 733.0*<br>ICD 10 diagnosis codes: M81.*                                                                                                                                                                                                                                                                                                                                                                                                                                                                                                                                                                                                                                                                                                                                                                                                                              |
| <b>Retinopathy</b>                                                               |                                                | ICD 9- CM diagnosis codes: 362.01, 362.02, 362.03, 362.04, 362.05, 362.06, 362.07<br>ICD 10 diagnosis codes: E08.311; E08.319; E08.3211; E08.3212; E08.3291; E08.3292; E08.3293; E08.3299; E08.3219; E08.3213; E08.3313; E08.3312; E08.3311; E08.3319; E08.3391; E08.3392; E08.3393; E08.3399; E08.3411; E08.3412; E08.3413; E08.3419; E08.3491; E08.3492; E08.3493; E08.3499; E08.3511; E08.3512; E08.3513; E08.3519; E08.3521; E08.3522; E08.3523; E08.3529; E08.3531; E08.3532; E08.3533; E08.3539; E08.3541; E08.3542; E08.3543; E08.3549; E08.3551; E08.3552; E08.3553; E08.3559; E08.3591; E08.3592; E08.3593; E08.3599; E11.311; E11.3491; E11.3492; E11.3493; E11.3499; E11.3591; E11.3592; E11.3593; E11.3599; E11.3591; E11.3592; E11.3593; E11.3599; E11.3291; E11.3292; E11.3293; E11.3299; E11.3391; E11.3392; E11.3393; E11.3399; E11.3491; E11.3492; E11.3493; E11.3499; E11.319 |
| <b>Amputations</b>                                                               |                                                | ICD 9- CM diagnosis codes: V49.75; V49.76; V49.77<br>ICD 10 diagnosis codes: Z89.519; Z47.81; Z89.6*                                                                                                                                                                                                                                                                                                                                                                                                                                                                                                                                                                                                                                                                                                                                                                                            |
| <b>Medications<br/>Antipsychotics</b>                                            | Atypical and typical antipsychotic medications | Lithium, Clozapine, Haloperidol, Loxapine, Lurasidone, Molindone, Olanzapine, Paliperidone, Quetiapine Fumerate; Risperidone, Aripiprazole, Asenapine, Ziprasidone, Chlorpromazine, Fluphenazine, Fluphenazine Deconate, Mesoridazine, Perphenazine, Thioridazine, Thiothixene; Trifluoperazine; Triflupromazine, Asenapine, Chlorprothixene, Iloperidone, Molindone, Promazine, Piperacetazine, Methotrimeprazine, Acetophenazine, Fazacllo/clozapine, Molindone                                                                                                                                                                                                                                                                                                                                                                                                                               |
| <b>ACE Inhibitors<br/>alone/combo<br/>ARBs<br/>alone/combo<br/>Beta-blockers</b> |                                                | Benazepril, Captopril, Enalapril, Fosinopril, Lisinopril, Moexipril, Perindopril, Quinapril, Ramipril, Trandolapril<br>Candesartan, Eprosartan, Irbesartan, Losartan, Azilsartan, Olmesartan, Telmisartan, Valsartan<br>Acebutolol, Atenolol, Betaxolol, Bisoprolol, Carteolol, Carvedilol, Esmolol, Labetalol, Metoprolol Tartrate, Metoprolol Succinate, Propranolol, Penbutolol, Pindolol, Nadolol, Sotalol, Timolol, Nebivolol                                                                                                                                                                                                                                                                                                                                                                                                                                                              |
| <b>Calcium Channel<br/>Blockers</b>                                              |                                                | Amlodipine, Isradipine; Felodipine, Nifedipine, Nifedipine ER, Niacardipine; Diltiazem, Verapamil, Nimodipine; Nisoldipine; Bepidil, Amlodipine/Atorvastatin, Clevidipine Butyrate; Mibefradil                                                                                                                                                                                                                                                                                                                                                                                                                                                                                                                                                                                                                                                                                                  |
| <b>Thiazide diuretics/<br/>Potassium sparing<br/>diuretics</b>                   |                                                | Chlorothiazide, Chlorthalidone, Hydrochlorothiazide, Methyclothiazide, Trichlormethiazide, Metolazone, Indapamide, Eplerenone; Amiloride, Spironolactone, Triamterene, Hydrochlorothiazide/Triamterene, Hydrochlorothiazide/Spironolactone, Bendroflumethiazide, Benzthiazide, Cyclothiazide, Hydroflumethiazide, Polythiazide, Quinethazone                                                                                                                                                                                                                                                                                                                                                                                                                                                                                                                                                    |

| <b>Covariate Condition</b>              | <b>Inclusive conditions</b> | <b>Definition*</b>                                                                                                                                                                                                                                                                |
|-----------------------------------------|-----------------------------|-----------------------------------------------------------------------------------------------------------------------------------------------------------------------------------------------------------------------------------------------------------------------------------|
| <b>Other Antihypertensives</b>          |                             | Doxazosin, Prazosin, Terazosin, Clonidine, Guanabenz, Guanfacine, Hydralazine, Methyldopa, Metyrosine, Reserpine, Minoxidil, Alfuzosin, Silodosin, Alseroxylon, Cryptenamine, Deserpidine, Diazoxide, Guanethidine, Mecamylamine, Pargyline, Rescinnamine, Trimethaphan Camsylate |
| <b>Anti-arrhythmics</b>                 | 1. Digoxin                  | Digoxin, Digitalis                                                                                                                                                                                                                                                                |
| <b>Digoxin and other inotropes</b>      | 2. Anti- Arrhythmics        | Adenosine, Amiodarone, Lidocaine, Flecainide, Ibutilide, , Procainamide, Propafenone, Ropafenone, Quinidine, Disopyramide, Verapamil, Dofetilide, Mexiletine, Moricizine, Tocainide                                                                                               |
| <b>Anticoagulants</b>                   |                             | Warfarin, Argatroban, Bivalirudin, Dalteparin, Enoxaprin, Eptifibatide, Fondaparinux, Heparin, Lepirudin, Tirofiban, Tinzaparin, Reviparin, Nadroparin, Ardeparin, Certoparin, Dabigatran                                                                                         |
| <b>Platelet inhibitors, not aspirin</b> |                             | Clopidogrel, Ticlopidine, Aspirin/Dipyridamole, Dipyridamole alone, Abciximab, Factor IX, Factor VIIa, Factor VIII, Prasugrel, Ticagrelor                                                                                                                                         |
| <b>Statins</b>                          |                             | Atorvastatin, Fluvastatin, Lovastatin, Pravastatin, Simvastatin, Rosuvastatin, Cerivastatin Pitavastatin, Lovastatin ER, Ezetimibe/Simvastatin, Lovastatin/Niacin, Amlodipine/Atorvastatin                                                                                        |
| <b>Non-Statins lipid lowering drugs</b> |                             | Cholestyramine, Colesevelam, Clofibrate, Colestipol, Niacin, Niacinamide, Fish Oil Concentrate, Omega 3 Fatty Acids, Gemfibrozil, Fenofibrate, Fenofibric Acid, Ezetimibe Omacor, Tricor/Fenofibrate, Ezetimibe/Simvastatin                                                       |
| <b>Nitrates</b>                         |                             | Amyl Nitrate, Isosorbide Dinitrate, Isosorbide Mononitrate, Erythryl Tetranitrate, Nitroglycerin (all forms--SA, Patch, SL, Ointment; Aerosol spray), Ranolazine                                                                                                                  |
| <b>Aspirin</b>                          |                             | Aspirin, Aspirin/ Dipyridamole                                                                                                                                                                                                                                                    |
| <b>Loop Diuretics</b>                   |                             | Furosemide, Ethacrynic acid, Bumetanide, Torsemide                                                                                                                                                                                                                                |

ACEI = angiotensin-converting enzyme inhibitor; ARB = angiotensin-receptor blocker; COPD = chronic obstructive pulmonary disease; CPT = Current Procedural Terminology; ICD-9- CM = International Classification of Diseases, Ninth Revision; ICD 10= International Classification of Diseases, Tenth Revision; MI = myocardial infarction; TIA = transient ischemic attack.

If medications are combinations of 2 drug classes then a patient is recorded as using both medications.

<sup>a</sup> Each co-morbid condition was defined as present if there was 1 specified inpatient or 2 specified outpatient codes separated by 30 days, or 1 specified procedure code or prescription for a medication defining that comorbid condition before reaching the creatinine threshold. Medications were searched in the pharmacy data using both generic and trade names.

## eTable 2: Propensity Score and matching weights

The cohort was composed of all eligible persons who reached the kidney threshold and were using metformin or sulfonylurea for diabetes treatment. The weighted cohort was formed using matching weights, derived using propensity scores, and up or downweighting patients to more closely resemble each other. Table 1 in the paper lists baseline covariates included. For simplicity, Table 1 presents year of reaching kidney threshold, whereas date of reaching kidney threshold is treated as a continuous covariate in the model. Missing covariate values were multiply imputed and indicators for each variable's missingness was included to account for potential informative missingness. The propensity scores used to create the matching weights were obtained using the last imputed data set and a regression model whose coefficients are found by averaging the coefficient estimates of all the imputed data sets. The PS model is displayed below.

The weighted analysis balances the covariate distributions by assigning various weights to the patients in both exposure groups such that the weighted groups resemble each other group (average treatment effect in evenly matchable units [ATM]). When comparing metformin and sulfonylurea users, both the metformin and sulfonylurea users were weighted so that their distribution of covariates resembled each other and at least a small amount of data is used from each subject. An important condition for weighting and propensity score methods is that every cohort member have a nontrivial probability of having received either of the study therapies. Our weighting procedure down-weighted metformin patients for whom very few similar sulfonylurea users existed (eFigure 2). When used to facilitate a weighted cohort, the success of the model is determined by the ability to include all patients and the achievement of covariate balance in the weighted cohort. eFigure 3 in the appendix demonstrates the standardized mean difference (SMD) before and after weighting. Table 1 in the paper demonstrates that all SMD after weighting have an absolute value < 0.1. Matching weights yield approximately equal weighted sample sizes and a pseudo-matched cohort. Summaries of the matching weights, by group demonstrate that among sulfonylurea users the median weight is 1.0, mean weight is 0.855 and 90<sup>th</sup> percentile is 1.0. Among metformin users the median weight is 0.25, mean weight is 0.36 and 90<sup>th</sup> percentile is 0.952.

Note eFigure 4 give the deviance for propensity score model as a measure of model fit.

|                                                       | <i>Chi-Square</i> | <i>d.f.</i> |
|-------------------------------------------------------|-------------------|-------------|
| <b>Demographics</b>                                   |                   |             |
| Age                                                   | 448.6284          | 2           |
| Gender                                                | 80.0880           | 1           |
| Race                                                  | 230.5030          | 2           |
| Months from hypoglycemic start until kidney threshold | 37.0795           | 2           |
| Date reached kidney threshold                         | 6711.5784         | 2           |
| VISN of Care                                          | 411.6695          | 20          |
| <b>Clinical and Laboratory Variables</b>              |                   |             |
| BMI                                                   | 34.8939           | 2           |
| Systolic Blood Pressure mm/Hg                         | 109.3335          | 2           |
| Diastolic Blood Pressure mm/Hg                        | 61.4275           | 2           |
| Hemoglobin                                            | 192.4439          | 2           |
| GFR                                                   | 11.2857           | 2           |
| GFR Historical                                        | 142.3088          | 2           |
| Creatinine                                            | 4.4570            | 2           |
| LDL_Cholesterol                                       | 38.3697           | 2           |
| A1c                                                   | 698.9043          | 2           |
| urine_protein                                         | 41.2867           | 4           |
| MACR                                                  | 13.4030           | 3           |
| <b>Healthcare Utilization</b>                         |                   |             |
| VA hospitalizations last year                         | 3.2121            | 1           |
| VA hospitalizations last 30 days                      | 0.1011            | 1           |

|                                                  | <i>Chi-Square</i> | <i>d.f.</i> |
|--------------------------------------------------|-------------------|-------------|
| Medicare/ Medicaid hospitalizations last year    | 0.1741            | 1           |
| Medicare/ Medicaid hospitalizations last 30 days | 0.2730            | 1           |
| Medicaid use                                     | 3.0689            | 1           |
| Medicare Use                                     | 2.2603            | 1           |
| Nursing Home Use                                 | 3.6494            | 1           |
| Number of Outpatient visits                      | 6.6576            | 2           |
| Number of Outpatient medications                 | 1.8145            | 2           |
| Medicare Advantage                               | 0.1585            | 1           |
| <b>Comorbidities</b>                             |                   |             |
| Malignancy                                       | 7.5313            | 1           |
| Liver_disease                                    | 179.3501          | 1           |
| HIV                                              | 4.5331            | 1           |
| CHF                                              | 126.6574          | 1           |
| CVD                                              | 14.4706           | 1           |
| Stroke                                           | 1.2396            | 1           |
| TIA                                              | 0.1974            | 1           |
| Serious_Mental_Illness                           | 8.8581            | 1           |
| Smoking                                          | 0.2823            | 1           |
| Chronic Obstructive Pulmonary Disease            | 0.5353            | 1           |
| Respiratory failure                              | 0.8799            | 1           |
| History of past Kidney disease                   | 7.2666            | 1           |
| Sepsis                                           | 3.1831            | 1           |
| Pneumonia                                        | 8.8373            | 1           |
| Arrhythmias                                      | 0.0161            | 1           |
| Cardiac valve                                    | 0.0239            | 1           |
| Parkinson                                        | 4.6249            | 1           |
| Urinary Tract Infection                          | 8.4451            | 1           |
| Osteomyelitis                                    | 4.8452            | 1           |
| Osteoporosis                                     | 0.0048            | 1           |
| Falls                                            | 0.6541            | 1           |
| Fractures                                        | 10.8701           | 1           |
| Amputation                                       | 7.6348            | 1           |
| Retinopathy                                      | 23.8684           | 1           |
| <b>Medications</b>                               |                   |             |
| ACE                                              | 2.0984            | 1           |
| ARB                                              | 5.9352            | 1           |
| Beta Blocker                                     | 1.4165            | 1           |
| Calcium Channel Blocker                          | 0.2617            | 1           |
| Thiazide diuretics                               | 17.4713           | 1           |
| Loop diuretics                                   | 117.4840          | 1           |
| Other Antihypertensives                          | 0.1820            | 1           |
| Statins                                          | 248.2555          | 1           |
| Non Statin lipid lowering medications            | 35.4201           | 1           |
| Antiarrhythmics                                  | 12.1575           | 1           |
| Anticoagulants                                   | 0.4459            | 1           |
| Nitrates                                         | 22.4636           | 1           |
| Aspirin                                          | 0.1485            | 1           |

|                                                 | <i>Chi-Square</i> | <i>d.f.</i> |
|-------------------------------------------------|-------------------|-------------|
| Platelet Inhibitors Non aspirin                 | 8.6273            | 1           |
| Antipsychotics                                  | 2.7354            | 1           |
| Oral Glucocorticoids                            | 9.9919            | 1           |
| <b>Indicators of Missing Clinical Variables</b> |                   |             |
| BMI_Missing                                     | 13.7566           | 1           |
| Blood_Pressure_Missing                          | 0.1771            | 1           |
| hemoglobin_Missing                              | 26.8750           | 1           |
| GFR Historical                                  | 34.4951           | 1           |
| LDL_Cholesterol_Missing                         | 1.2188            | 1           |
| A1c_Missing                                     | 48.1251           | 1           |



**eTable 3: Subgroup analysis**

|                                                               | <b>Metformin</b>   | <b>Sulfonylurea</b> | <b>P value for Interaction</b> |
|---------------------------------------------------------------|--------------------|---------------------|--------------------------------|
| <b>No Cardiovascular disease (N in weighted cohort)</b>       | 16882              | 16931               |                                |
| <i>Composite Major Adverse Cardiovascular Events</i>          | 537                | 723                 |                                |
| Person-Years                                                  | 32164              | 33216               |                                |
| Unadjusted Rate/1000 person-years (95% CI)                    | 16.7 (15.4, 18.2)  | 21.8 (20.3, 23.4)   |                                |
| Adjusted Hazard Ratio <sup>a</sup> (95% CI)                   | 0.78 (0.70, 0.86)  | Reference           |                                |
| Adjusted Incident Rate Difference <sup>c</sup> (95% CI)       | -4.8 (-3.3, -6.1)  |                     | <i>p = 0.34</i>                |
| <b>Cardiovascular Disease (N in weighted cohort)</b>          | 7797               | 7868                |                                |
| <i>Composite Major Adverse Cardiovascular Events</i>          | 511                | 671                 |                                |
| Person-Years                                                  | 13377              | 14547               |                                |
| Unadjusted Rate/1000 person-years (95% CI)                    | 38.2 (35.1, 41.6)  | 46.1 (42.8, 49.6)   |                                |
| Adjusted Hazard Ratio <sup>a</sup> (95% CI)                   | 0.83 (0.75, 0.92)  | Reference           |                                |
| Adjusted Incident Rate Difference <sup>c</sup> (95% CI)       | -7.9 (-4.0, -10.7) |                     |                                |
| <b>Age younger than 65 years (N in weighted cohort)</b>       | 7883               | 8034                |                                |
| <i>Composite Major Adverse Cardiovascular Events</i>          | 178                | 258                 |                                |
| Person-Years                                                  | 12791              | 13642               |                                |
| Unadjusted Rate/1000 person-years (95% CI)                    | 13.9 (12.0, 16.1)  | 18.9 (16.7, 21.3)   |                                |
| Adjusted Hazard Ratio <sup>a</sup> (95% CI)                   | 0.78 (0.66, 0.92)  | Reference           |                                |
| Adjusted Incident Rate Difference <sup>c</sup> (95% CI)       | -4.2 (-1.7, -5.7)  |                     | <i>p = 0.53</i>                |
| <b>Age 65 years and older (N in weighted cohort)</b>          | 16796              | 16764               |                                |
| <i>Composite Major Adverse Cardiovascular Events</i>          | 870                | 1136                |                                |
| Person-Years                                                  | 32751              | 34120               |                                |
| Unadjusted Rate/1000 person-years (95% CI)                    | 26.6 (24.9, 28.4)  | 33.3 (31.4, 35.3)   |                                |
| Adjusted Hazard Ratio <sup>a</sup> (95% CI)                   | 0.81 (0.75, 0.88)  | Reference           |                                |
| Adjusted Incident Rate Difference <sup>c</sup> (95% CI)       | -6.3 (-4.2, -7.9)  |                     |                                |
| <b>Non-Black race (N in weighted cohort)</b>                  | 20644              | 20752               |                                |
| <i>Composite Major Adverse Cardiovascular Events</i>          | 941                | 1240                |                                |
| Person-Years                                                  | 40274              | 41107               |                                |
| Unadjusted Rate/1000 person-years (95% CI)                    | 23.4 (21.9, 24.9)  | 30.2 (28.6, 31.9)   |                                |
| Adjusted Hazard Ratio <sup>a</sup> (95% CI)                   | 0.80 (0.74, 0.86)  | Reference           |                                |
| Adjusted Incident Rate Difference <sup>c</sup> (95% CI)       | -6.0 (-4.5, -7.4)  |                     | <i>p = 0.69</i>                |
| <b>Black race (N in weighted cohort)</b>                      | 4035               | 4047                |                                |
| <i>Composite Major Adverse Cardiovascular Events</i>          | 107                | 154                 |                                |
| Person-Years                                                  | 5268               | 6656                |                                |
| Unadjusted Rate/1000 person-years (95% CI)                    | 20.4 (16.9, 24.6)  | 23.1 (19.7, 27.0)   |                                |
| Adjusted Hazard Ratio <sup>b</sup> (95% CI)                   | 0.84 (0.67, 1.06)  | Reference           |                                |
| Adjusted Incident Rate Difference <sup>c</sup> (95% CI)       | -3.7 (-6.5, 1.6)   |                     |                                |
| <b>eGFR <math>\geq</math>45 ml/min (N in weighted cohort)</b> | 22444              | 22578               | <i>GFR spline</i>              |
| <i>Composite Major Adverse Cardiovascular Events</i>          | 973                | 1262                | <i>terms</i>                   |
| Person-Years                                                  | 43072              | 440306              | <i>eGFR</i>                    |
| Unadjusted Rate/1000 person-years (95% CI)                    | 22.6 (21.2, 24.0)  | 28.5 (27.0, 30.1)   | <i>p = 0.38</i>                |
| Adjusted Hazard Ratio <sup>a</sup> (95% CI)                   | 0.80 (0.74, 0.86)  | Reference           | <i>eGFR'</i>                   |
| Adjusted Incident Rate Difference <sup>c</sup> (95% CI)       | -5.7 (-4.2, -7.0)  |                     | <i>p = 0.54</i>                |

|                                                                    | Metformin          | Sulfonylurea      | <i>P</i> value for Interaction |
|--------------------------------------------------------------------|--------------------|-------------------|--------------------------------|
| <b>eGFR 30-45 ml/min (N in weighted cohort)</b>                    | 1903               | 1886              |                                |
| <i>Composite Major Adverse Cardiovascular Events</i>               | 65                 | 115               |                                |
| Person-Years                                                       | 2178               | 2968              |                                |
| Unadjusted Rate/1000 person-years (95% CI)                         | 29.9 (23.6, 37.9)  | 38.7 (32.3, 46.3) |                                |
| Adjusted Hazard Ratio <sup>b</sup> (95% CI)                        | 0.79 (0.59, 1.04)  | Reference         |                                |
| Adjusted Incident Rate Difference <sup>c</sup> (95% CI)            | -8.1 (-13.2, 1.9)  |                   |                                |
| <b>eGFR&lt;30ml/min (N in weighted cohort)</b>                     | 332                | 334               |                                |
| <i>Composite Major Adverse Cardiovascular Events</i>               | 10                 | 17                |                                |
| Person-Years                                                       | 292                | 488               |                                |
| Unadjusted Rate/1000 person-years (95% CI)                         | 33.6 (18.3, 61.1)  | 34.3 (21.5, 54.5) |                                |
| Adjusted Hazard Ratio <sup>b</sup> (95% CI)                        | 0.82 (0.25, 2.72)  | Reference         |                                |
| Adjusted Incident Rate Difference <sup>c</sup> (95% CI)            | -6.2 (-16.1, 93.7) |                   |                                |
| <b>Serum Creatinine greater than FDA threshold</b>                 | 4806               | 4892              |                                |
| <i>Composite Major Adverse Cardiovascular Events</i>               | 125                | 229               |                                |
| Person-Years                                                       | 5733               | 7779              |                                |
| Unadjusted Rate/1000 person-years (95% CI)                         | 21.9 (18.4, 26.0)  | 29.5 (26.0, 33.5) |                                |
| Adjusted Hazard Ratio <sup>b</sup> (95% CI)                        | 0.74 (0.61, 0.90)  | Reference         |                                |
| Adjusted Incident Rate Difference <sup>c</sup> (95% CI)            | -7.7 (-3.4, -10.1) |                   | <i>p</i> =0.46                 |
| <b>eGFR&lt;60 ml/min with Serum Creatinine below FDA threshold</b> | 19873              | 19907             |                                |
| <i>Composite Major Adverse Cardiovascular Events</i>               | 923                | 1164              |                                |
| Person-Years                                                       | 39809              | 39983             |                                |
| Unadjusted Rate/1000 person-years (95% CI)                         | 23.2 (21.8, 24.7)  | 29.1 (27.5, 30.8) |                                |
| Adjusted Hazard Ratio <sup>b</sup> (95% CI)                        | 0.81 (0.75, 0.88)  | Reference         |                                |
| Adjusted Incident Rate Difference <sup>c</sup> (95% CI)            | -5.5 (-3.7, -6.9)  |                   |                                |

<sup>a</sup> Cox Proportional Hazards model for time to event. Adjusted for demographics, clinical information derived from the electronic health record, comorbidities, use of medications and health care utilization (see Supplemental table 1). All continuous variables were modeled as restricted cubic splines.

<sup>b</sup> Reduced model to allow for convergence All covariates in above model except VISN of care regrouped into regions and model excluded comorbidities with small numbers (HIV, history of Kidney disease, Osteomyelitis, Osteoporosis, Falls, Sepsis, Parkinson's, Amputation and Retinopathy)

<sup>c</sup> The decrease in the number of events per 1000 person-years of metformin use compared with sulfonylurea use among patients with reduced kidney function. The adjusted rate difference is estimated by multiplying the unadjusted incident rate for sulfonylurea by the adjusted hazard ratio minus 1. Confidence bounds are calculated using the respective bounds from the hazard ratio.

## eFigure 1 Study Design Schematic

**Main analysis: Comparison of metformin versus sulfonylurea initiators who reached the kidney threshold, and continued their original regimen, persistent exposure on the original regimen is required to remain in follow-up.** Gaps (red bars) of up to 90 days are allowed for medication refill after reaching kidney threshold. Patients begin follow-up at the kidney threshold and are censored at addition of another diabetes treatment or no medication refill for 90 days.

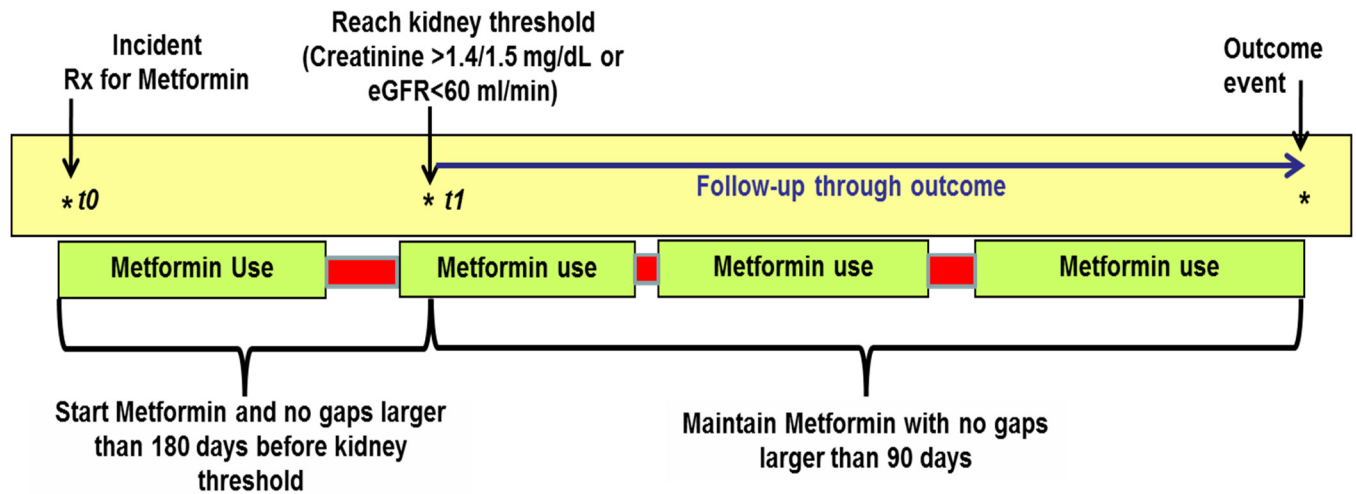

**Sensitivity Analysis: Comparison of metformin versus sulfonylurea initiators who reached the kidney threshold, persistent exposure on the original regimen is not required to remain in follow-up.** In this approach, patients are analyzed as users of their regimen regardless of switching, stopping or additions (akin to intent to treat analysis). The resultant exposure misclassification, if non-differential would bias to null effect between treatment regimens.

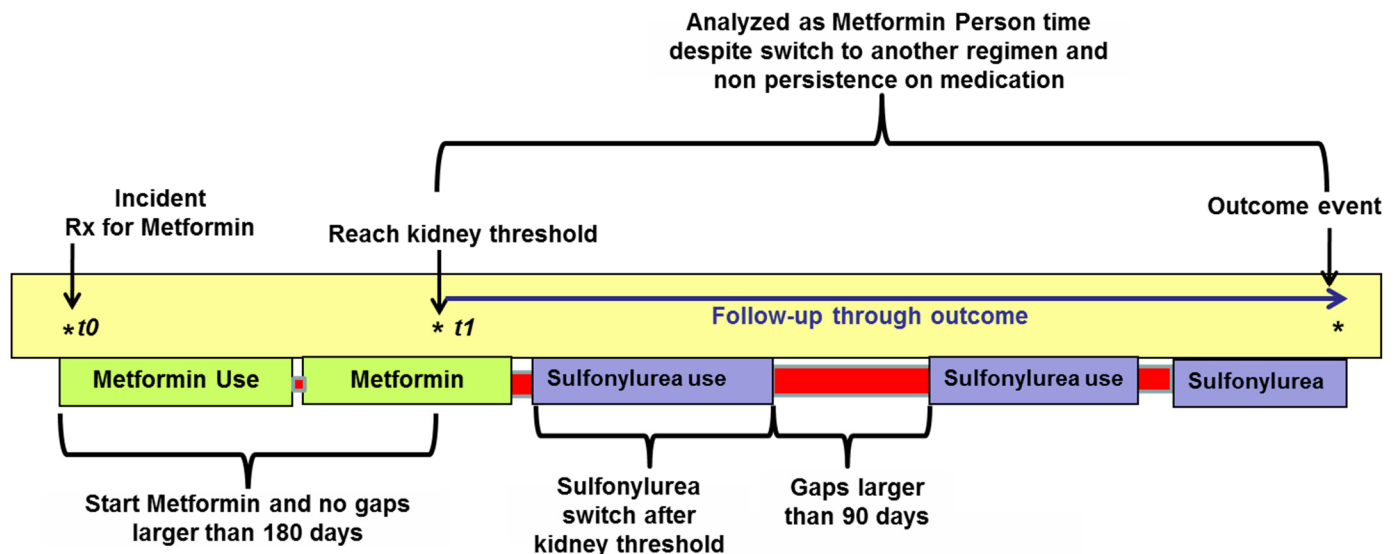

eFigure 2 Distribution of logit of propensity scores by drug

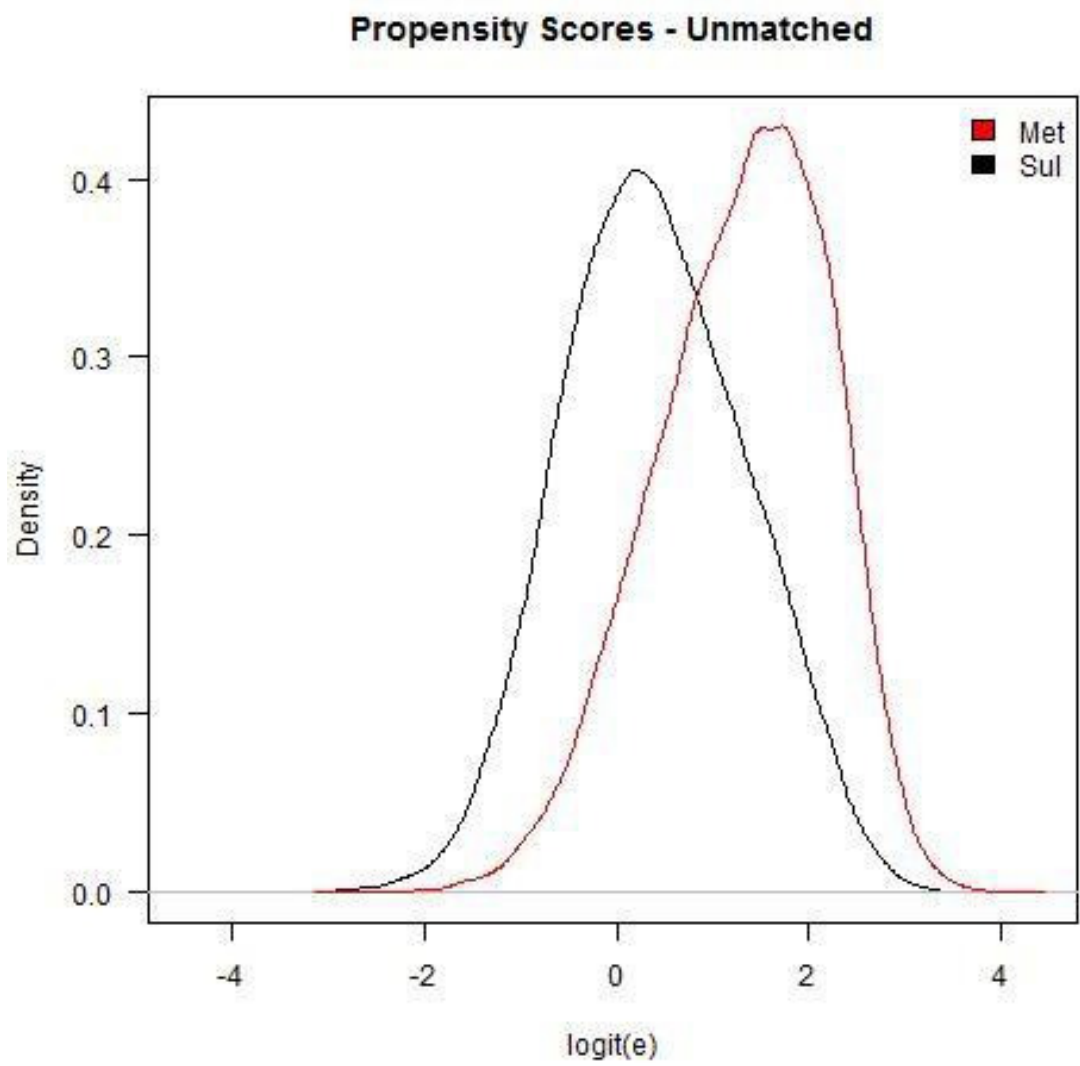

**eFigure 3: Standardized Mean differences (SMD) comparing metformin versus sulfonylurea before and after weighting the cohort**

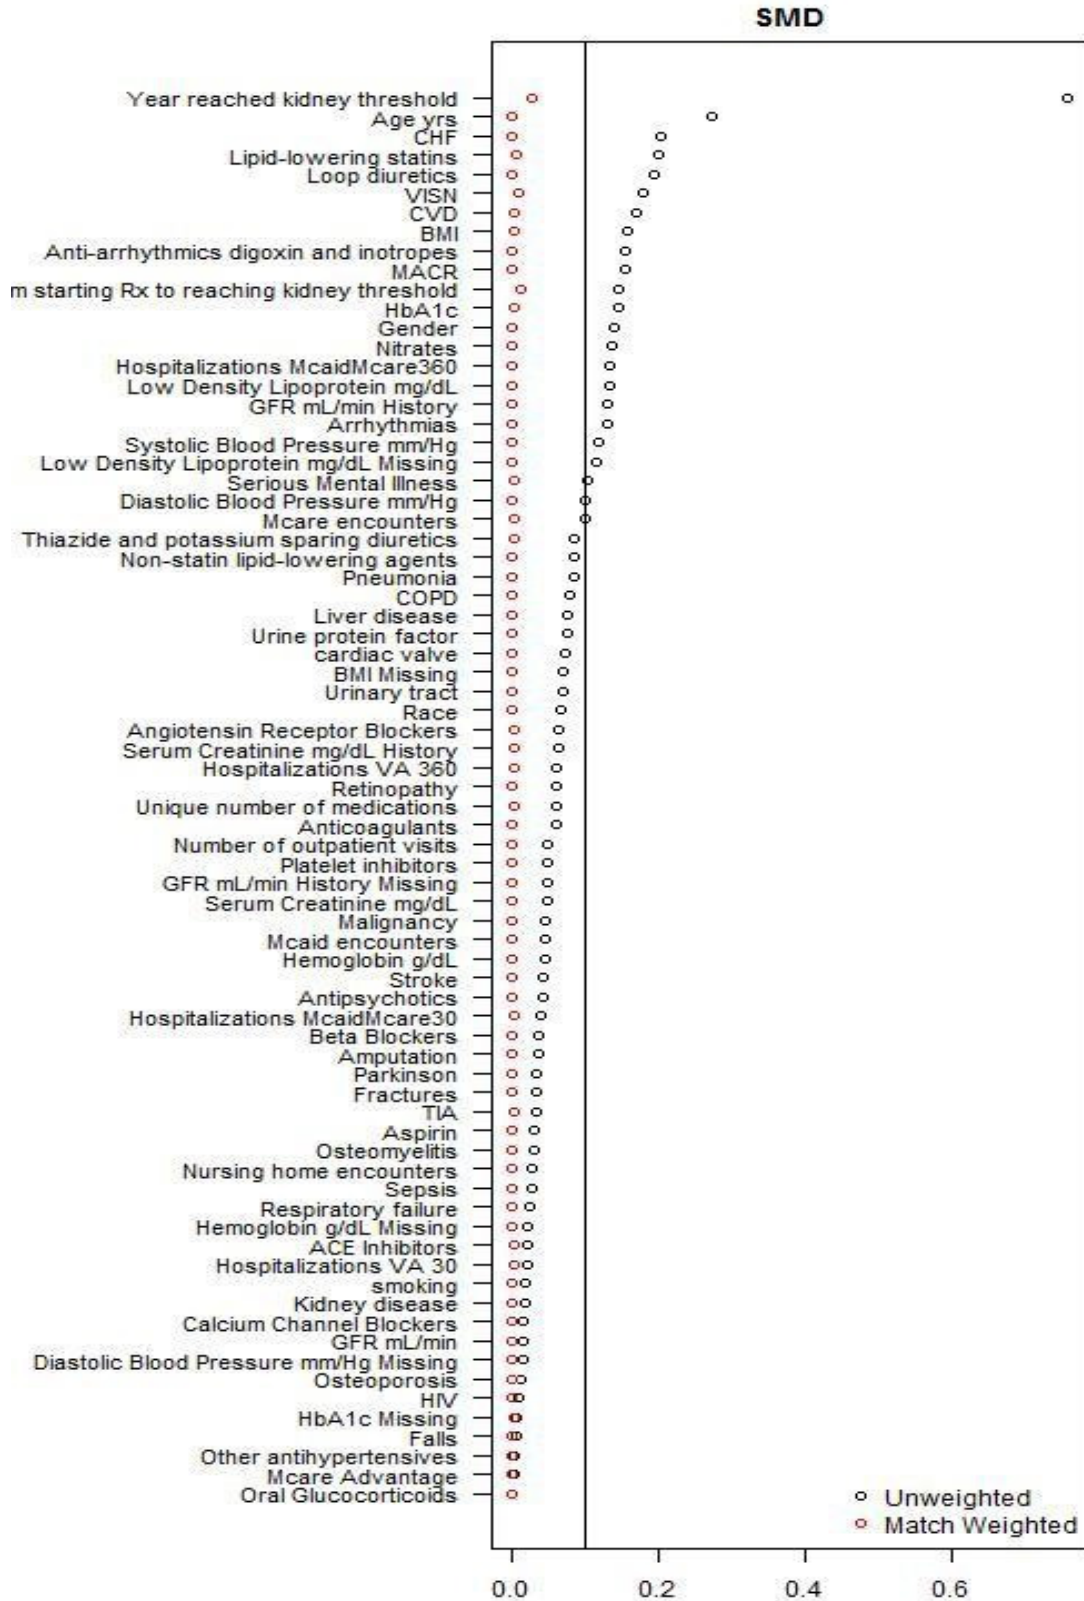

**eFigure 4: Deviance of baseline covariates from the Propensity Score Model, relative contribution of each covariate in predicting exposure group.**

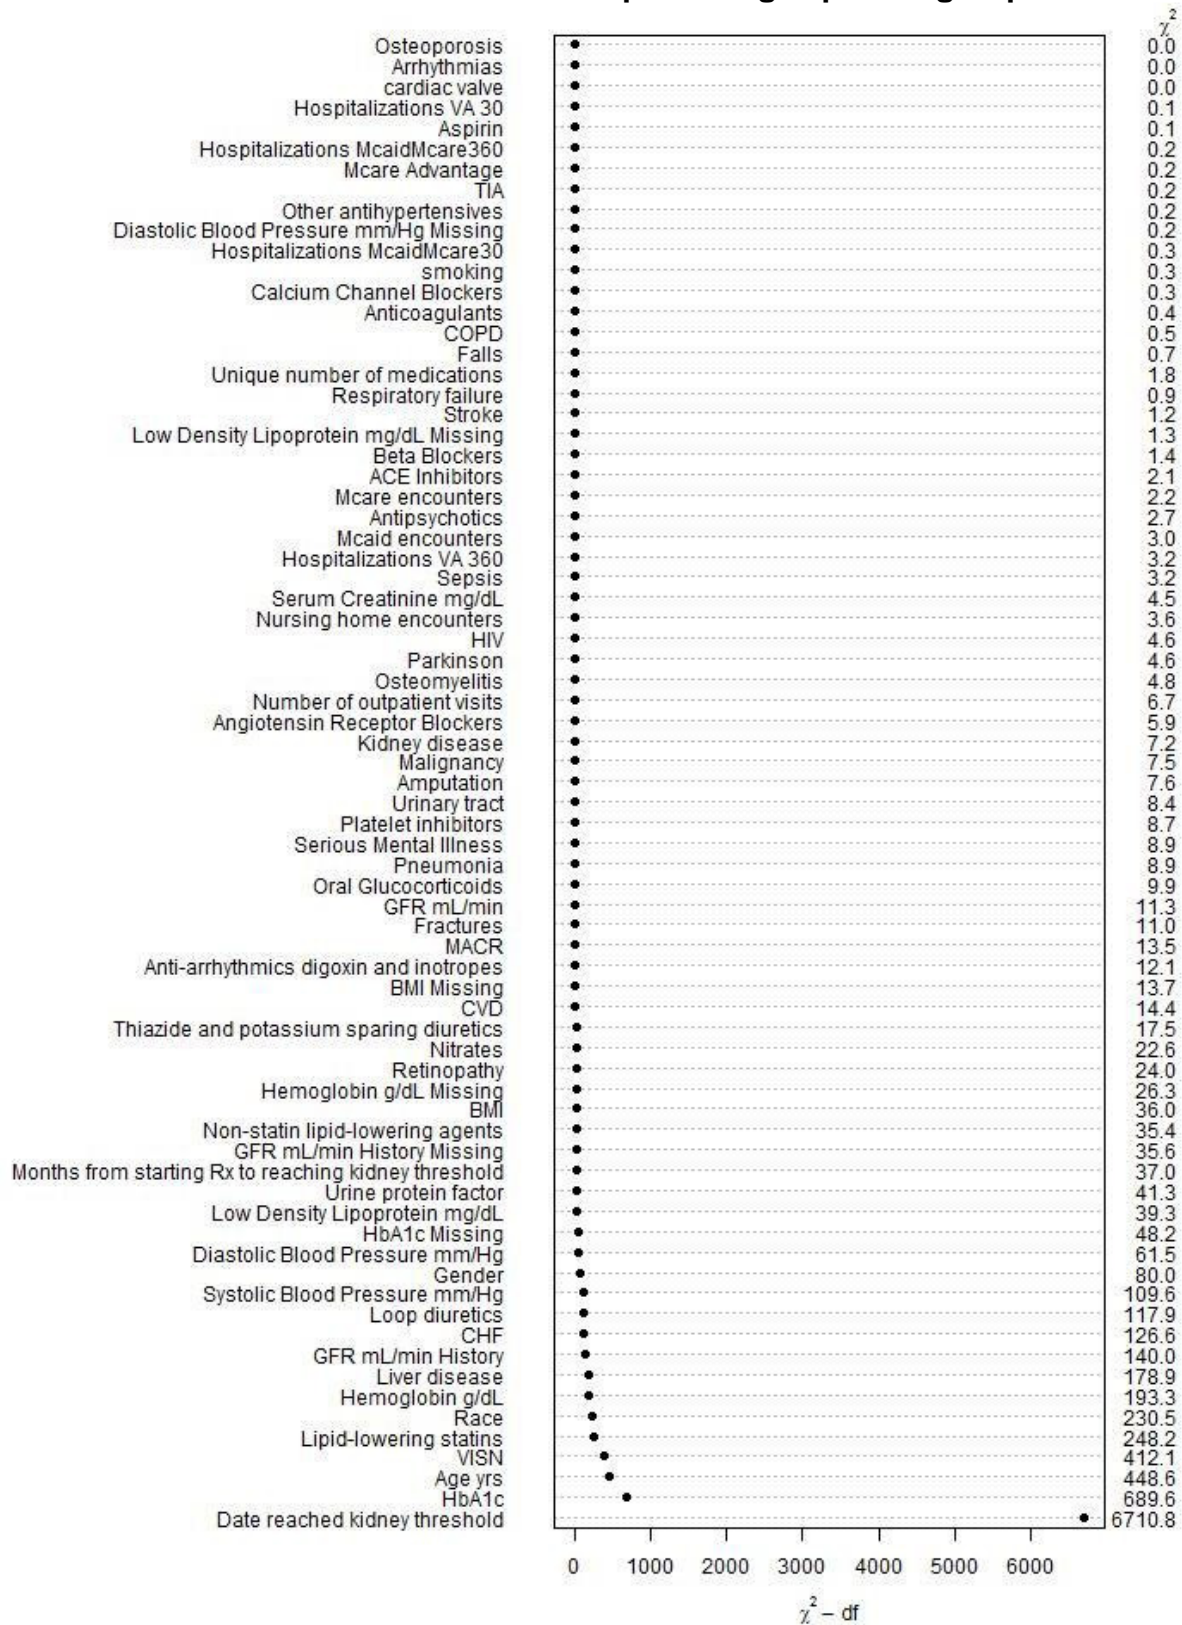

**eFigure 5: Aalen–Johansen cumulative incidence demonstrating Major Adverse Cardiovascular Events with the competing risks of non-persistence and death from non-cardiovascular cause in weighted cohort**

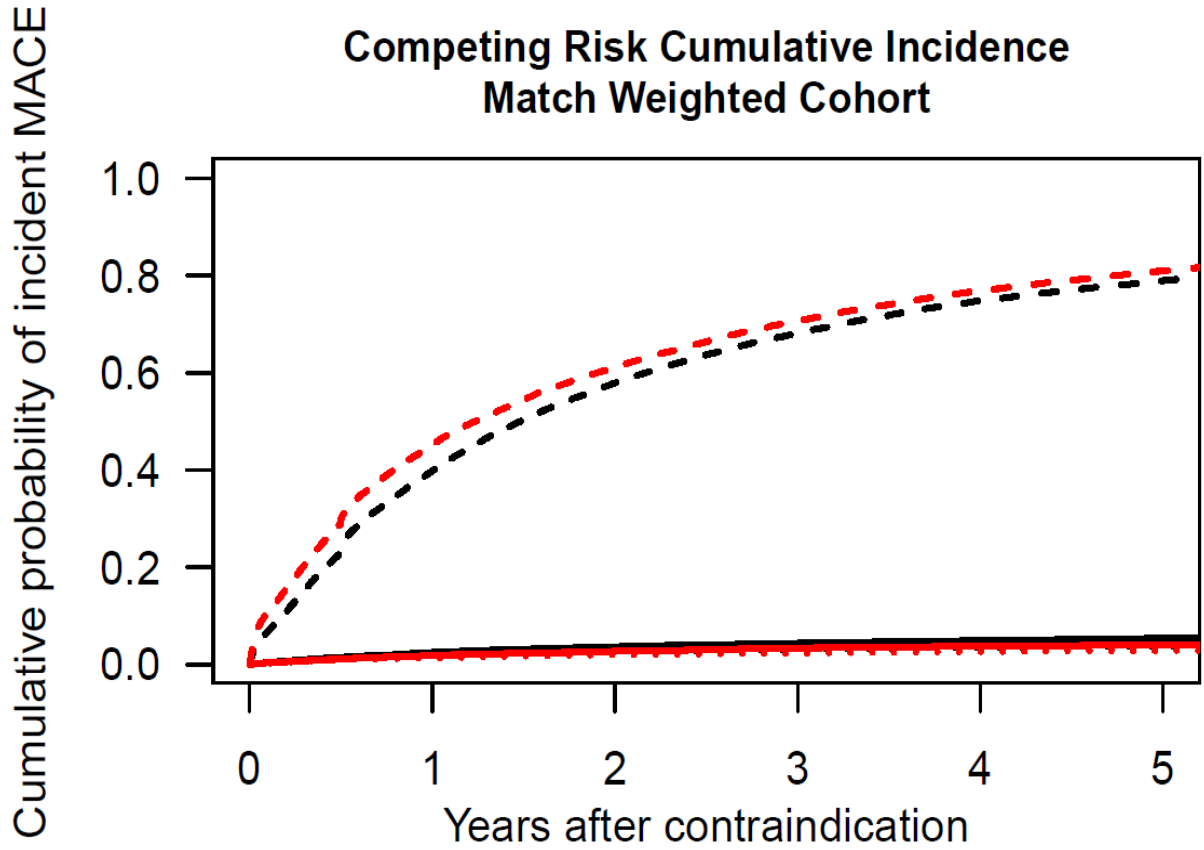

Number in initial state

|     |       |       |      |      |      |      |
|-----|-------|-------|------|------|------|------|
| Met | 24679 | 12563 | 7862 | 5097 | 3366 | 2252 |
| Sul | 24799 | 13587 | 8272 | 5320 | 3452 | 2262 |

--- Non-Persist Mono:  
Sulfonylurea

..... Death: Sulfonylurea

— MACE: Sulfonylurea

--- Non-Persist Mono:  
Metformin

..... Death: Metformin

— MACE: Metformin
